# Supplementary material for: 5-(2-Pyridil)-1H-tetrazole complexes with Mo(iv) and W(iv) cyanides
Source: Royal Society of Chemistry journal article supplement (doi:10.1039/c6dt04908g), 2017-01-01
Supplement: c6dt04908g1.pdf [file c6dt04908g1.pdf]

## 5-(2-pyridil)-1H-tetrazole complexes with Mo(IV) and W(IV) cyanides.

A. Mrowiec<sup>a</sup>, A. Jurowska<sup>a</sup>, M. Hodorowicz<sup>a</sup> and J. Szklarzewicz<sup>a</sup>

<sup>a</sup> Jagiellonian University, Faculty of Chemistry, 30-060 Kraków, R. Ingardena 3, Poland. E-mail: szklarze@chemia.uj.edu.pl, tel: 48-12-663-2231, fax: 48-12-634-05-15.

**Keywords:** Molybdenum • Tungsten • Tetrazole •

### Electronic Supplementary Information

**Table S1** Bond lengths (Å) and angles (°) in **1** and **2**.

| <b>1</b>                |           | <b>2</b>                |          |
|-------------------------|-----------|-------------------------|----------|
| <b>Bond lengths (Å)</b> |           | <b>Bond lengths (Å)</b> |          |
| Mo(1A)-O(1A)            | 1.698(14) | W(1A)-O1                | 1.717(3) |
| Mo(1A)-N4               | 2.455(8)  | W(1A)-N4                | 2.288(4) |
| Mo(1A)-N8               | 2.096(7)  | W(1A)-N8                | 2.182(4) |
| Mo(1A)-C1               | 2.209(6)  | W(1A)-C1                | 2.162(4) |
| Mo(1A)-C(2A)            | 2.165(12) | W(1A)-C2                | 2.146(4) |
| Mo(1A)-C3               | 2.205(5)  | W(1A)-C3                | 2.162(4) |
| N1-C1                   | 1.141(7)  | N1-C1                   | 1.147(5) |
| N(2A)-C(2A)             | 1.112(14) | N2-C2                   | 1.140(5) |
| N3-C3                   | 1.134(7)  | N3-C3                   | 1.145(5) |
| N4-N5                   | 1.361(10) | N4-N5                   | 1.364(5) |
| N4-C4                   | 1.358(9)  | N4-C4                   | 1.339(5) |
| N5-N6                   | 1.308(8)  | N5-N6                   | 1.329(5) |
| N6-N7                   | 1.377(10) | N6-N7                   | 1.373(6) |
| N7-C4                   | 1.332(10) | N7-C4                   | 1.328(6) |
| N8-C5                   | 1.345(11) | N8-C5                   | 1.363(6) |
| N8-C9                   | 1.443(13) | N8-C9                   | 1.371(6) |
| C4-C5                   | 1.439(12) | C4-C5                   | 1.457(7) |

|                   |           |                   |            |
|-------------------|-----------|-------------------|------------|
| C5-C6             | 1.388(11) | C5-C6             | 1.387(6)   |
| C6-C7             | 1.455(16) | C6-C7             | 1.387(7)   |
| C7-C8             | 1.359(16) | C7-C8             | 1.379(8)   |
| C8-C9             | 1.370(13) | C8-C9             | 1.370(7)   |
| <b>Angles (°)</b> |           | <b>Angles (°)</b> |            |
| N4-Mo(1A)-O(1A)   | 165.5(4)  | N4-W(1A)-O1       | 163.42(14) |
| N4-Mo(1A)-N8      | 70.9(3)   | N4-W(1A)-N8       | 71.77(14)  |
| N4-Mo(1A)-C1      | 76.7(2)   | N4-W(1A)-C1       | 79.76(13)  |
| N4-Mo(1A)-C(2A)   | 90.0(4)   | N4-W(1A)-C2       | 92.54(15)  |
| N4-Mo(1A)-C3      | 77.1(2)   | N4-W(1A)-C3       | 78.17(13)  |
| N8-Mo(1A)-O(1A)   | 94.7(5)   | N8-W(1A)-O1       | 91.79(15)  |
| N8-Mo(1A)-C1      | 96.0(2)   | N8-W(1A)-C1       | 89.56(13)  |
| N8-Mo(1A)-C(2A)   | 160.7(4)  | N8-W(1A)-C2       | 164.06(16) |
| N8-Mo(1A)-C3      | 89.6(2)   | N8-W(1A)-C3       | 95.81(13)  |

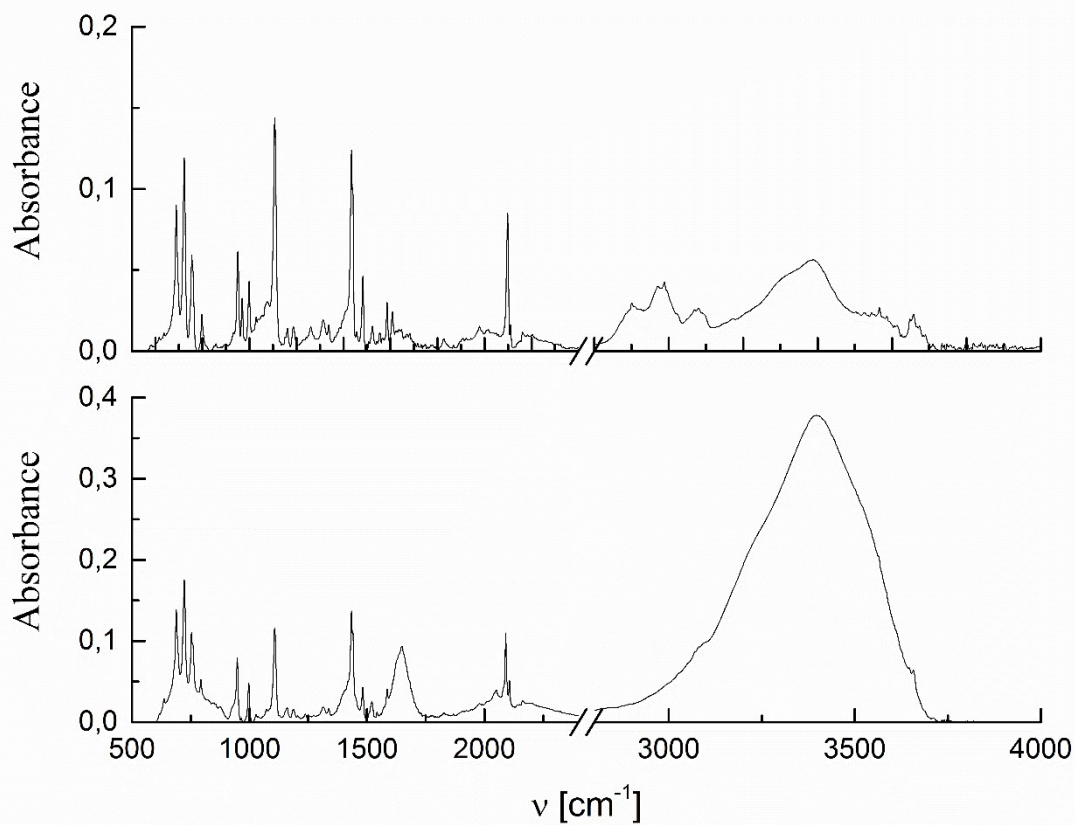

**Fig. S1** IR spectrum of **1** (top) and **2** (bottom).

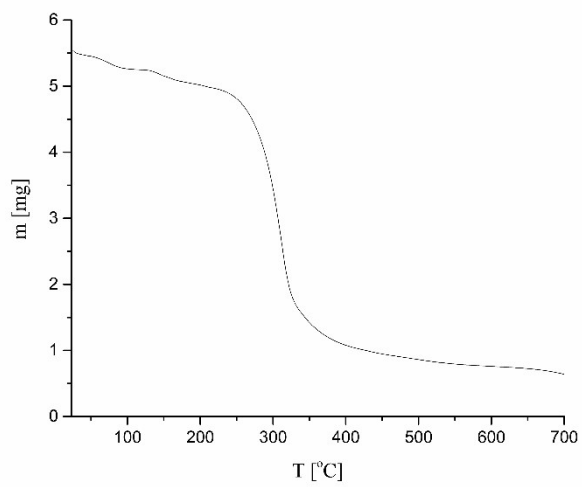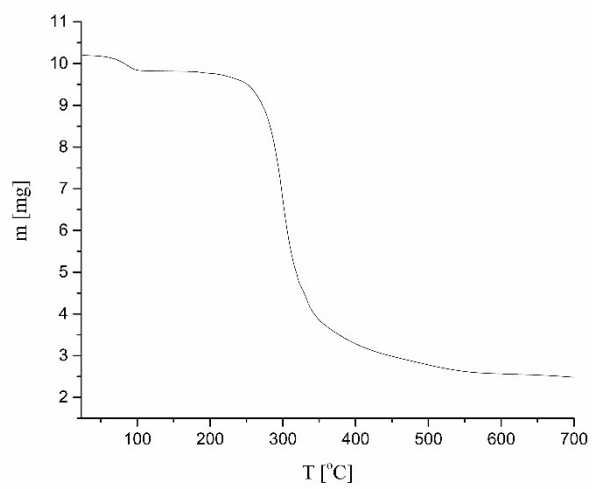

**Fig. S2** Thermograms of **1** (top) and **2** (bottom).
